# Supplementary material
Source: publisher site journal article supplement (https://www.dovepress.com/get_supplementary_file.php?f=389420.xlsx)
Supplement: Supplementary file 1 [file get_supplementary_file.php]

## Sheet: Dictionary
Appendix: Full deidentified dataset
VARIABLE	DESCRIPTION
newid	Identification number
age	Age in years
t2dfamhis	Family history of type 2 diabetes: 0 No, 1 Yes
bmi_pregestational	Pregestational body mass index
pregnancies	Number of pregnancies
bmi_cat	Categorical pregestational body mass index: 1 (min/25) 2 (25.1–30), 3 (30.1–35), 4 (35.1/max)
age_cat	Categorical age: 1 (min/20), 2 (20.1–25), 3 (25.1–34.9), 4 (35/max)
parity	Parity: 0 primipara, 1 multipara
ogtt_date	Date of OGTT
fas_ogtt_pgluc	OGTT fasting plasma glucose mg/dl
1h_ogtt_pgluc	OGTT 1-hr posload plasma glucose mg/dl
2h_ogtt_pgluc	OGTT 2-hr posload plasma glucose mg/dl
fas_ogtt_cbgluc	OGTT fasting capillary blood glucose mg/dl
1h_ogtt_cbgluc	OGTT 1-hr posload capillary blood glucose mg/dl
1h_ogtt_cbgluc	OGTT 2-hr posload capillary blood glucose mg/dl
gd_dx	Gestational diabetes diagnosis: 0 No, 1 Yes

## Sheet: Database
newid	age	t2dfamhis	bmi_pregestational	pregnancies	bmi_cat	age_cat	parity	ogtt_date	fas_ogtt_pgluc	1h_ogtt_pgluc	2h_ogtt_pgluc	fas_ogtt_cbgluc	1h_ogtt_cbgluc	1h_ogtt_cbgluc	gd_dx
1	23	No	25.5	2	3	2	2	8-24-2018	73	87	79	102	102	90	0
2	24.7	No	25.9	1	3	2	1	9-22-2019	67	99	100	98	128	127	0
3	16	No	23	1	2	1	1	12-17-2019	75	101	103	85	105	109	0
4	24.1	Yes	22.8	2	2	2	2	7-22-2019	86	102	95	91	107	104	0
5	24.2	No	32.1	2	4	2	2	7-31-2019	72	132	69	85	134	73	0
6	25.9	No	25.9	2	3	3	2	2019-02-09	85	130	120	103	190	141	0
7	16.5	No	21.8	1	2	1	1	7-24-2019	88	119	101	87	150	123	0
8	17.5	No	20.1	1	2	1	1	2019-05-08	71	78	91	79	108	105	0
9	29.4	No	23	6	2	3	2	2019-02-10	89	178	89	89	238	106	0
10	17.4	No	24.5	2	2	1	2	8-19-2019	86	113	119	85	113	125	0
11	29.8	No	30.1	3	4	3	2	2019-06-09	83	142	107	85	157	119	0
12	26.5	No	17.2	3	1	3	2	9-19-2019	77	155	119	81	167	129	0
13	20.5	No	21.6	1	2	2	1	7-29-2019	82	102	83	78	127	98	0
14	28.3	No	22.6	4	2	3	2	8-14-2019	82	118	108	84	123	125	0
15	19.8	No	19	1	2	1	1	8-14-2019	79	126	107	84	159	123	0
16	22.1	No	19.8	1	2	2	1	11-21-2019	75	60	68	91	98	102	0
17	29	No	22	2	2	3	2	8-13-2019	79	99	73	82	155	82	0
18	25	Yes	28.6	2	3	2	2	2019-10-09	87	167	132	87	167	132	0
19	17.6	No	18.7	1	2	1	1	2019-07-08	81	91	104	81	106	105	0
20	24.5	No	22.5	2	2	2	2	8-26-2019	79	148	89	86	148	136	0
21	14.7	No	20.6	1	2	1	1	2019-06-09	60	75	69	81	72	97	0
22	21.8	Yes	19.9	2	2	2	2	2019-03-09	80	126	74	95	149	111	0
23	29	Yes	26.7	3	3	3	2	2019-02-09	75	108	127	94	130	142	0
24	26.6	No	18.9	2	2	3	2	8-15-2019	77	81	93	90	95	111	0
25	19.6	No	31.7	2	4	1	2	2019-05-09	92	76	91	94	123	99	1
26	25.2	Yes	30.5	1	4	3	1	7-22-2019	88	120	113	93	122	122	0
27	20.8	No	25.2	2	3	2	2	8-20-2019	85	151	95	96	165	91	0
28	23.3	Yes	26.2	2	3	2	2	2019-04-10	85	128	82	87	169	107	0
29	16.9	No	21.7	1	2	1	1	8-19-2019	83	112	91	93	140	100	0
30	29.2	Yes	34.4	1	4	3	1	2019-08-11	76	89	103	90	115	116	0
31	33.1	No	20.1	3	2	3	2	7-17-2019	80	82	89	77	122	119	0
32	33.2	No	21	3	2	3	2	2019-05-08	78	126	110	84	133	122	0
33	32.8	No	28.4	5	3	3	2	8-20-2019	81	163	125	86	169	132	0
34	34	No	25	3	3	3	2	2019-11-10	85	133	126	93	171	143	0
35	16.4	No	18.5	1	1	1	1	7-29-2019	78	120	110	78	131	114	0
36	22.1	Yes	22.4	2	2	2	2	8-26-2019	106	172	150	88	173	172	1
37	36.1	No	31.5	1	4	4	1	8-13-2019	83	164	114	85	172	124	0
38	18.6	No	23	1	2	1	1	8-26-2019	84	83	128	99	113	146	0
39	17	No	19.2	2	2	1	2	10-30-2019	73	112	69	86	145	91	0
40	18.4	No	24.1	1	2	1	1	11-13-2019	72	88	90	82	114	103	0
41	19.8	No	17.7	3	1	1	2	2019-08-08	79	99	93	85	127	95	0
42	23.4	No	23.2	1	2	2	1	2019-04-09	104	202	122	108	195	126	1
43	23.8	No	27.7	3	3	2	2	2019-02-10	87	115	99	96	153	135	0
44	27.6	Yes	24.5	3	2	3	2	10-21-2019	83	108	74	83	119	99	0
45	29.1	Yes	29.5	2	3	3	2	2019-08-08	87	177	124	96	164	117	0
46	20.3	Yes	20.5	2	2	2	2	8-16-2019	78	71	105	90	103	128	0
47	20.5	No	22.6	2	2	2	2	2019-11-11	80	123	94	77	151	107	0
48	24.4	No	19.7	1	2	2	1	7-31-2019	78	90	87	80	114	109	0
49	17.7	No	20.2	3	2	1	2	2019-07-08	76	98	77	79	119	111	0
50	30	No	23.6	4	2	3	2	2019-06-08	77	110	123	86	127	129	0
51	20.1	No	20.2	1	2	2	1	2019-08-08	83	84	93	81	91	95	0
52	23.9	Yes	26.8	3	3	2	2	2019-09-08	82	145	129	86	153	127	0
53	15.1	Yes	21.6	1	2	1	1	8-28-2019	84	114	65	83	151	87	0
54	21.2	No	20.7	1	2	2	1	9-17-2019	71	97	93	84	126	108	0
55	23.1	No	20.5	2	2	2	2	2019-06-09	76	106	84	81	133	112	0
56	24.5	Yes	31.1	3	4	2	2	2019-06-11	69	153	94	90	172	144	0
57	15.8	No	21.9	1	2	1	1	9-20-2019	78	82	67	87	110	90	0
58	27.3	No	25.6	1	3	3	1	8-13-2019	71	151	103	79	165	118	0
59	18.2	No	24.3	1	2	1	1	10-16-2019	103	154	92	106	164	92	1
60	33.7	Yes	21.5	2	2	3	2	8-16-2019	94	132	114	85	117	98	1
61	23.6	Yes	21.9	2	2	2	2	2019-11-11	73	167	145	87	180	154	0
62	26.1	No	18	2	1	3	2	2019-02-09	63	78	73	84	137	88	0
63	18.5	No	20.6	1	2	1	1	9-30-2019	80	83	97	85	99	136	0
64	20.4	No	25	2	3	2	2	2019-03-12	82	107	118	83	131	116	0
65	26	Yes	25.4	2	3	3	2	2019-09-12	77	124	128	92	152	147	0
66	19.1	No	20	1	2	1	1	2019-09-10	81	84	100	83	96	120	0
67	29.1	No	26.2	4	3	3	2	2019-10-12	78	80	109	88	101	131	0
68	20.9	Yes	32.4	1	4	2	1	8-20-2019	88	150	109	98	192	133	0
69	18.1	No	22.5	1	2	1	1	2019-06-09	90	125	89	92	157	102	0
70	26.3	Yes	26.2	2	3	3	2	2019-01-10	94	201	104	106	228	130	1
71	16.6	No	23.3	1	2	1	1	10-16-2019	81	95	126	98	103	137	0
72	15.9	No	21.9	1	2	1	1	11-19-2019	75	111	101	85	148	121	0
73	17.9	No	40.1	1	4	1	1	8-30-2019	74	98	77	78	132	78	0
74	23	No	19.4	2	2	2	2	8-27-2019	63	92	90	86	155	151	0
75	20.2	No	26.3	1	3	2	1	9-19-2019	87	96	117	95	114	128	0
76	17.4	No	16.1	2	1	1	2	2019-10-09	78	128	98	78	128	98	0
77	19.1	Yes	22.8	2	2	1	2	11-20-2019	88	96	109	99	94	98	0
78	18.6	No	16.4	1	1	1	1	2019-02-12	87	112	132	93	152	165	0
79	18.6	No	20.3	1	2	1	1	1-30-2020	78	69	97	95	112	117	0
80	19.7	No	24.4	2	2	1	2	2019-06-09	85	103	104	90	104	112	0
81	17.8	Yes	20.3	2	2	1	2	2019-07-11	86	165	115	99	169	123	0
82	21.3	No	21.4	1	2	2	1	2019-09-12	80	89	62	88	132	94	0
83	19.8	No	26.7	1	3	1	1	2019-11-12	82	93	82	93	115	117	0
84	16.2	Yes	19.6	1	2	1	1	9-24-2019	80	146	110	87	143	109	0
85	25.3	No	24.1	1	2	3	1	10-15-2019	93	247	206	98	239	195	1
86	18.5	No	21.2	1	2	1	1	1-21-2020	70	58	81	90	86	127	0
87	32.5	Yes	26.2	1	3	3	1	9-19-2019	79	163	94	90	171	106	0
88	39.1	Yes	27.4	3	3	4	2	1-22-2020	80	132	114	88	168	153	0
89	20.7	No	21.5	1	2	2	1	9-26-2019	70	103	71	79	114	71	0
90	37.9	No	23.6	3	2	4	2	9-24-2019	86	117	111	89	118	113	0
91	24	No	19.8	2	2	2	2	2019-09-10	91	124	91	74	99	66	0
92	22	No	25.7	2	3	2	2	11-22-2019	86	137	90	91	179	145	0
93	25.5	Yes	23.8	1	2	3	1	1-13-2020	80	155	91	88	177	99	0
94	18.6	Yes	22.9	1	2	1	1	2019-08-10	75	85	77	78	111	93	0
95	16.8	No	22.2	1	2	1	1	10-15-2019	66	82	124	80	82	144	0
96	31.7	Yes	27.8	4	3	3	2	2019-01-10	74	109	122	83	122	134	0
97	27	No	31	3	4	3	2	12-18-2019	84	128	93	97	152	124	0
98	22.4	No	21.2	1	2	2	1	12-19-2019	78	90	109	84	113	130	0
99	24.4	No	22.6	3	2	2	2	10-16-2019	76	92	69	82	119	89	0
100	26.6	No	28.7	4	3	3	2	2-13-2020	63	96	91	80	137	122	0
101	24.6	Yes	32.3	1	4	2	1	2019-12-11	87	139	108	86	137	117	0
102	19.6	Yes	21.8	1	2	1	1	12-18-2019	75	105	80	85	126	109	0
103	19.4	No	38.9	1	4	1	1	2019-06-11	70	131	71	80	174	85	0
104	23.5	No	23.8	3	2	2	2	2019-11-10	80	94	82	87	101	105	0
105	21.6	No	17.9	2	1	2	2	2019-03-12	81	126	85	87	146	109	0
106	22.4	No	21	3	2	2	2	12-20-2019	75	81	94	85	115	121	0
107	16.9	No	21.9	1	2	1	1	1-21-2020	75	118	84	92	157	129	0
108	29	No	30.5	2	4	3	2	2019-02-12	77	190	110	87	102	137	1
109	19.7	No	25.6	2	3	1	2	2-24-2020	80	107	86	90	156	110	0
110	27	Yes	25.9	1	3	3	1	2-21-2020	72	98	81	92	136	114	0
111	17.7	No	21	1	2	1	1	2019-03-12	69	92	75	104	147	102	0
112	15.8	No	21.6	1	2	1	1	11-29-2019	81	129	128	80	152	130	0
113	38.9	No	24.1	2	2	4	2	11-15-2019	81	167	130	86	192	149	0
114	37.9	No	29	4	3	4	2	2019-11-12	81	110	93	85	153	104	0
115	20.1	Yes	24.2	1	2	2	1	12-19-2019	79	76	78	92	115	107	0
116	24.2	No	19.4	3	2	2	2	1-16-2020	75	103	46	87	160	78	0
117	18.6	No	21.1	2	2	1	2	11-14-2019	81	104	75	92	140	113	0
118	18.8	No	19.7	2	2	1	2	2020-02-03	73	115	94	79	149	114	0
119	20.6	No	21.2	1	2	2	1	10-22-2019	70	107	61	84	129	85	0
120	29.7	No	22.7	2	2	3	2	1-15-2020	82	129	102	82	148	125	0
121	28.4	Yes	35.8	2	4	3	2	2-13-2020	77	135	102	103	190	132	0
122	21.7	No	22.2	2	2	2	2	12-17-2019	78	117	84	85	150	106	0
123	17.2	No	21.6	1	2	1	1	2020-11-02	68	62	70	83	81	106	0
124	23.9	Yes	24.2	3	2	2	2	1-14-2020	66	88	82	85	130	111	0
125	21.1	Yes	21.9	1	2	2	1	2-17-2020	73	101	90	89	127	116	0
126	20.1	No	18.2	1	1	2	1	1-13-2020	69	102	91	78	140	119	0
127	18.7	No	25.3	1	3	1	1	1-15-2020	79	91	82	83	101	96	0
128	20.9	No	23.4	2	2	2	2	2020-12-02	83	126	88	74	104	80	0
129	18.6	No	30	1	4	1	1	1-23-2020	84	178	122	88	194	139	0
130	23.9	No	18.8	3	2	2	2	2-18-2020	66	97	92	83	137	110	0
131	26.9	No	25.5	3	3	3	2	2020-02-03	78	118	117	89	149	179	0
132	16.5	No	21.8	1	2	1	1	1-15-2020	74	135	56	85	157	73	0
133	29.6	Yes	30.4	2	4	3	2	2020-06-03	84	167	103	88	201	128	0
134	25.6	No	25.7	2	3	3	2	1-31-2020	70	134	109	80	147	126	0
135	17	No	18	1	1	1	1	3-30-2020	79	84	74	87	103	100	0
136	25.9	No	17.7	2	1	3	2	11-15-2019	85	114	107	90	144	131	0
137	18.1	No	20.9	1	2	1	1	12-17-2019	78	107	87	81	127	133	0
138	24.4	No	26	3	3	2	2	2-27-2020	73	73	102	91	117	130	0
139	25	Yes	35	3	4	2	2	11-27-2019	69	111	107	79	149	117	0
140	28.3	No	23.4	3	2	3	2	11-25-2019	80	72	39	85	147	97	0
141	29	Yes	24.2	1	2	3	1	1-16-2020	78	118	76	86	133	104	0
142	27.2	No	30	2	4	3	2	2020-10-03	76	87	90	86	115	105	0
143	28.5	No	23.6	1	2	3	1	2020-02-04	82	150	108	95	169	112	0
144	31.6	No	30.8	3	4	3	2	2-19-2020	78	123	124	81	149	133	0
145	21.9	No	20.5	2	2	2	2	2020-06-03	81	123	100	95	150	122	0
146	18.4	No	25.4	2	3	1	2	1-20-2020	68	101	74	81	121	124	0
147	19	Yes	27	2	3	1	2	1-17-2020	75	117	123	82	129	112	0
148	26.4	Yes	23.6	3	2	3	2	2020-04-02	80	104	116	97	149	138	0
149	20.6	No	22.5	1	2	2	1	12-20-2019	83	91	82	88	124	106	0
150	30.2	Yes	32.9	2	4	3	2	3-30-2020	75	102	110	89	144	125	0
151	24.1	No	18.2	1	1	2	1	2-26-2020	74	47	75	88	93	128	0
152	19.5	No	29.9	1	3	1	1	2019-11-12	88	110	97	87	145	138	0
153	19.6	Yes	29.6	1	3	1	1	3-30-2020	86	168	106	108	232	130	0
154	21.4	No	18.8	1	2	2	1	2019-11-12	84	115	74	97	146	116	0
155	25.3	Yes	19.6	3	2	3	2	12-18-2019	68	46	75	79	81	131	0
156	18.2	No	21	2	2	1	2	1-16-2020	82	130	118	81	156	143	0
157	18.6	No	22.3	1	2	1	1	1-16-2020	74	133	60	75	158	80	0
158	18.4	No	16.8	1	1	1	1	1-20-2020	78	96	87	94	115	124	0
159	20	No	23.1	1	2	1	1	12-19-2019	84	101	64	88	128	78	0
160	17.3	No	30.1	1	4	1	1	12-19-2019	79	121	101	89	152	129	0
161	24.7	No	21.3	3	2	2	2	1-13-2020	72	133	97	83	155	125	0
162	17.8	No	21.2	2	2	1	2	2020-11-03	77	99	85	92	127	103	0
163	18.7	No	22.1	2	2	1	2	3-26-2020	78	114	93	89	153	137	0
164	25.7	No	25.2	1	3	3	1	2020-03-06	80	138	119	97	161	146	0
165	18.3	Yes	19.1	1	2	1	1	1-22-2020	95	108	75	104	152	115	1
166	15.3	No	25.6	1	3	1	1	1-17-2020	73	131	90	88	146	122	0
167	26.7	Yes	29.4	1	3	3	1	2-19-2020	69	134	100	89	163	157	0
168	19.2	No	21.9	1	2	1	1	1-22-2020	77	47	80	86	76	113	0
169	19.5	Yes	22.3	1	2	1	1	1-21-2020	81	140	105	94	144	136	0
170	24.1	No	26.4	1	3	2	1	2-18-2020	73	111	92	96	180	123	0
171	16.3	No	25.1	1	3	1	1	1-24-2020	79	97	94	87	113	120	0
172	25.4	No	31.4	1	4	3	1	2020-03-06	71	114	109	86	138	123	0
173	26.7	No	26.4	3	3	3	2	2020-04-06	79	97	105	86	117	118	0
174	31.6	No	17.9	1	1	3	1	2020-07-02	81	144	103	109	175	122	0
175	27.6	No	22.2	1	2	3	1	2-25-2020	68	127	127	89	147	139	0
176	29.7	No	28.1	2	3	3	2	3-26-2020	76	108	109	84	113	221	0
177	24.3	No	18.1	2	1	2	2	2-28-2020	65	92	71	84	128	107	0
178	30.1	No	23.4	3	2	3	2	3-20-2020	65	139	105	80	175	124	0
179	26	No	32.9	1	4	3	1	2-14-2020	64	91	83	82	156	111	0
180	21.9	No	19	1	2	2	1	2-24-2020	79	84	100	86	85	118	0
181	24.3	Yes	27.8	2	3	2	2	2020-03-06	81	136	99	102	162	110	0
182	24.7	No	23.1	1	2	2	1	2020-10-03	84	184	100	94	213	122	1
183	20.8	Yes	21.2	1	2	2	1	2020-08-06	76	95	111	83	116	131	0
184	22.3	No	26.6	1	3	2	1	3-26-2020	70	92	85	91	121	103	0
185	34.9	No	23.2	3	2	3	2	3-26-2020	73	107	89	84	122	98	0
186	22.4	No	21.5	2	2	2	2	2020-03-03	93	92	93	90	108	116	1
187	24.7	No	20.1	1	2	2	1	2020-05-08	72	118	88	85	147	116	0
188	20.1	No	23.6	1	2	2	1	2020-04-03	68	100	91	79	150	138	0
189	21.8	Yes	33.8	1	4	2	1	2020-04-03	112	204	169	129	232	189	1
190	36.2	Yes	27.7	2	3	4	2	2020-03-06	98	235	183	120	249	196	1
191	36.2	Yes	26.4	2	3	4	2	3-20-2020	64	131	127	87	180	144	0
192	22.4	No	24	1	2	2	1	2020-04-06	75	119	135	84	138	137	0
193	19	Yes	18.1	1	1	1	1	3-27-2020	68	151	132	84	176	149	0
194	18.3	No	23.5	1	2	1	1	2020-08-06	78	83	121	83	97	142	0
195	24	No	24.6	2	2	2	2	3-19-2020	73	112	103	80	147	128	0
196	23.1	Yes	29.8	1	3	2	1	2020-05-06	86	131	94	99	138	105	0
197	23.3	Yes	39.7	1	4	2	1	2020-05-08	76	144	92	92	154	106	0
198	16.9	No	19	1	2	1	1	8-13-2020	71	192	195	85	213	130	1
199	23.4	No	24.2	1	2	2	1	2020-10-08	84	125	121	100	155	151	0
200	19.9	No	23.8	1	2	1	1	2020-06-08	77	152	150	102	177	177	0
201	31.2	Yes	32.5	2	4	3	2	8-27-2020	73	145	67	91	172	77	0
202	26.9	No	24.4	2	2	3	2	2020-11-08	69	63	94	88	115	119	0
203	18.7	Yes	23.5	1	2	1	1	2020-11-08	88	139	119	96	161	132	0
204	21.5	No	22.3	1	2	2	1	9-14-2020	109	222	170	111	225	179	1
205	18.4	No	23.8	1	2	1	1	2020-01-09	72	94	100	84	104	113	0
206	32.8	Yes	20	3	2	3	2	8-19-2020	84	99	102	100	157	133	0
207	39.1	No	26.1	3	3	4	2	8-25-2020	69	101	88	84	109	98	0
208	31.7	No	23	1	2	3	1	2020-02-09	72	78	109	84	96	132	0
209	37.7	No	29.9	2	3	4	2	2020-07-09	84	129	219	106	131	223	1
210	31.5	Yes	30.5	5	4	3	2	10-20-2020	79	109	103	91	124	113	0
211	19.4	No	24.2	1	2	1	1	8-31-2020	72	108	93	81	132	121	0
212	17.1	No	20.8	1	2	1	1	2020-07-09	75	96	94	89	132	102	0
213	19.9	No	19.9	1	2	1	1	2020-11-09	90	141	96	92	174	119	0
214	21.7	No	20.2	1	2	2	1	2020-11-09	82	93	96	96	97	116	0
215	26.2	No	33.7	1	4	3	1	9-17-2020	86	130	112	91	127	125	0
216	30.8	No	22.9	1	2	3	1	9-24-2020	94	151	102	88	145	112	1
217	20.6	No	20	1	2	2	1	9-18-2020	91	107	109	92	126	119	0
218	30.3	Yes	25.3	3	3	3	2	10-26-2020	74	133	90	87	148	106	0
219	19.6	No	17.9	1	1	1	1	9-25-2020	71	99	103	76	128	119	0
220	25.7	No	24.3	2	2	3	2	11-17-2020	119	225	220	120	220	212	1
221	27.5	No	22.6	2	2	3	2	10-15-2020	77	78	87	79	95	91	0
222	19.3	No	20.1	1	2	1	1	10-28-2020	74	129	95	83	143	101	0
223	16.9	No	19	1	2	1	1	10-30-2020	79	93	105	85	114	113	0
224	25.7	No	27.5	2	3	3	2	10-30-2020	88	117	93	90	131	116	0
225	31.8	No	20.6	3	2	3	2	10-29-2020	74	125	98	82	156	112	0
226	31	No	32.8	2	4	3	2	1-13-2021	82	155	103	85	173	117	0
227	33.8	Yes	25	4	3	3	2	11-13-2020	87	189	161	84	181	180	1
228	26.2	No	25.6	2	3	3	2	11-13-2020	94	122	109	96	153	122	1
229	17.4	No	23	1	2	1	1	2020-06-11	78	150	120	81	171	111	0
230	26.3	No	25.3	2	3	3	2	11-18-2020	79	87	115	85	139	139	0
231	20.2	No	21.6	1	2	2	1	11-18-2020	75	85	94	81	105	97	0
232	37.4	Yes	26	3	3	4	2	11-26-2020	106	192	142	100	189	154	1
233	38.3	Yes	24.7	4	2	4	2	2020-04-12	85	157	203	92	149	219	1
234	29.7	No	39.8	2	4	3	2	1-15-2021	79	126	112	96	140	134	0
235	19.8	No	25.9	1	3	1	1	1-21-2020	106	110	123	115	153	145	1
236	36.7	Yes	26.5	2	3	4	2	1-21-2021	99	210	135	99	205	132	1
237	30.2	No	26.6	3	3	3	2	1-19-2021	95	122	114	95	135	126	1
238	35.2	Yes	33	3	4	4	2	2021-03-02	95	233	239	88	108	153	1
239	21.2	No	32.7	2	4	2	2	2021-04-03	85	117	92	78	121	94	0
240	18.3			1		1	1	2021-04-03	82	136	109	92	158	127	0
241	18.3			1		1	1	2021-05-03	63	135	110	76	145	148	0
242	24.9	Yes	24.3	1	2	2	1	2021-05-03	80	130	143	89	144	142	0
243	34.6	No	30	4	4	3	2	2021-05-03	95	161	151	101	172	147	1
244	24.5	No	27.3	1	3	2	1	3-17-2021	78	106	121	79	119	130	0
245	34.3	No	26.4	3	3	3	2	3-18-2021	92	149	112	91	152	117	1
246	28	No	24.7	1	2	3	1	2021-12-03	129	245	264	112	226	239	1
247	23	No	29.1	3	3	2	2	3-18-2021	96	138	100	101	157	113	1
248	23.4	No	29.5	3	3	2	2	3-24-2021	93	178	92	89	190	103	1
249	22.4	No	26.5	2	3	2	2	5-14-2021	87	115	110	87	108	112	0
250	19.8	No	20.5	1	2	1	1	4-16-2021	76	107	88	75	112	128	0
251	29	No	20.7	3	2	3	2	4-15-2021	80	95	93	92	102	126	0
252	27.2	No	31.3	2	4	3	2	2021-05-05	107	214	184	106	230	215	1
253	37.4	No	18.9	1	2	4	1	2021-05-05	86	94	93	91	117	106	0
254	33.6	No	23	2	2	3	2	2021-10-05	81	152	101	86	158	116	0
255	19.5	Yes	23.4	2	2	1	2	5-13-2021	80	94	91	98	116	107	0
256	20.8	No		1		2	1	5-14-2021	85	83	99	88	98	108	0
257	22	No	22	2	2	2	2	5-18-2021	81	101	81	80	113	97	0
258	27.8	No	19.4	1	2	3	1	5-20-2021	102	230	192	118	248	214	1
259	20.6			1		2	1	5-17-2021	82	74	124	89	95	126	0
260	32.8	No	26.9	1	3	3	1	5-31-2021	78	186	135	85	204	156	1
261	31.9	Yes	31.1	2	4	3	2	5-28-2021	97	182	188	105	199	192	1
262	23.8	Yes	22.7	2	2	2	2	5-28-2021	77	100	102	88	136	116	0
263	38.8	No	29.1	2	3	4	2	5-21-2021	79	106	94	92	129	129	0
264	20.6	No	19.7	1	2	2	1	5-20-2021	82	103	97	85	129	116	0
265	22.2			1		2	1	5-19-2021	77	149	127	82	158	131	0
266	33.8	Yes	37	2	4	3	2	5-26-2021	85	190	145	86	195	154	1
267	19.4	No	19.2	1	2	1	1	6-24-2021	79	137	92	82	152	108	0
268	20.2	No	18.7	1	2	2	1	2021-10-06	76	45	81	85	86	124	0
269	28.2	No	27.1	2	3	3	2	2021-02-07	79	145	138	80	139	147	0
270	31.1	Yes	38.1	2	4	3	2	2021-04-06	86	184	145	92	200	162	1
271	17.4	No	27.1	1	3	1	1	6-14-2021	73	115	90	91	168	112	0
272	35.5	No	34.2	2	4	4	2	2021-07-06	105	163	133	111	170	170	1
273	25.2	No	23.1	1	2	3	1	2021-09-06	75	112	87	91	140	123	0
274	36.8	Yes	30.8	4	4	4	2	6-15-2021	80	135	129	81	165	135	0
275	34.6	Yes	24.3	2	2	3	2	6-18-2021	77	126	76	86	137	104	0
276	18.9	Yes	28	1	3	1	1	6-15-2021	80	82	108	84	93	109	0
277	30.1	No	31.1	1	4	3	1	2021-10-06	101	163	130	112	178	138	1
278	25.6	Yes	29.4	1	3	3	1	2021-10-06	83	166	148	86	209	158	0
279	25.8	No	22.8	3	2	3	2	2021-09-06	76	138	122	92	164	137	0
280	27.2	Yes	29.5	4	3	3	2	6-18-2021	95	137	128	99	149	141	1
281	25.8	No	25.9	2	3	3	2	6-25-2021	69	160	85	105	202	135	0
282	18.1	No	24	2	2	1	2	2021-09-07	82	116	106	83	137	108	0
283	27.8	Yes	17.7	3	1	3	2	6-23-2021	81	95	102	79	143	100	0
284	24.6	Yes	26.3	2	3	2	2	6-24-2021	91	130	101	96	156	110	0
285	26.4	Yes	35.7	1	4	3	1	2021-06-07	80	173	123	76	173	115	0
286	21.4	No	24	1	2	2	1	6-28-2021	86	146	114	83	151	112	0
287	27.8	Yes	29.5	1	3	3	1	2021-06-07	80	94	94	89	101	92	0
288	15.9	Yes	30.7	1	4	1	1	7-26-2021	76	116	68	80	133	73	0
289	24.8	No	23.5	3	2	2	2	2021-07-07	87	87	70	98	122	95	0
290	27.9	No	18.6	2	2	3	2	2021-07-07	74	104	87	82	119	108	0
291	28.2	No	21.3	2	2	3	2	2021-08-07	81	111	125	90	131	136	0
292	31.5	Yes	24	2	2	3	2	2021-12-07	81	119	95	81	119	126	0
293	20	No	27.5	1	3	1	1	7-13-2021	76	118	80	79	149	116	0
294	33.1	Yes	21.8	3	2	3	2	7-26-2021	92	176	127	95	185	138	1
295	30.8	No	28.8	1	3	3	1	7-28-2021	87	179	114	90	179	116	0
296	19.9	Yes	23.4	1	2	1	1	7-13-2021	83	155	149	89	161	156	0
297	37.2	No	22.2	1	2	4	1	7-15-2021	82	150	113	94	160	123	0
298	26.3	Yes	25.6	1	3	3	1	7-16-2021	85	196	127	91	203	140	1
299	22	No	22.2	1	2	2	1	7-23-2021	82	97	96	82	104	101	0
300	27.1	No	18.7	2	2	3	2	7-20-2021	82	184	152	88	187	158	1
301	19	No	20.2	2	2	1	2	7-22-2021	76	79	91	88	86	93	0
302	15.8	No	27.9	2	3	1	2	7-20-2021	92	214	109	103	214	107	1
303	25.8	No	21.8	3	2	3	2	7-22-2021	76	111	73	84	118	109	0
304	22	No	21.4	3	2	2	2	7-26-2021	73	99	119	82	129	111	0
305	28.2	Yes	24.9	2	2	3	2	2021-02-08	82	182	144	93	187	154	1
306	24.9	Yes	28.2	2	3	2	2	7-30-2021	78	79	90	82	107	131	0
307	17.8	No	23.8	1	2	1	1	10-14-2019	76	67	99	82	93	103	0
308	18.3	No	26.6	1	3	1	1	10-17-2019	82	106	91	88	127	113	0
309	16.1	No	21.1	1	2	1	1	11-19-2019	78	119	100	86	135	113	0
310	23.7	No	21.3	3	2	2	2	2020-08-01	75	100	95	83	137	120	0
311	27	Yes	21.9	2	2	3	2	2019-08-10	76	126	131	85	154	150	0
312	25.8	Yes	28.6	2	3	3	2	2019-07-10	89	155	111	100	185	138	0
313	24.5	No	30.1	2	4	2	2	2019-08-10	100	201	178	104	214	193	1
314	40.6	Yes	28	5	3	4	2	11-28-2019	79	153	163	88	164	165	1
315	21.6	No	25.1	1	3	2	1	2019-08-10	78	148	137	93	165	162	0
316	27.5	No	25.7	2	3	3	2	12-17-2019	75	170	123	79	175	139	0
317	20.5	No	24.2	1	2	2	1	2019-05-11	74	89	95	81	123	111	0
318	28.6	No	18.2	2	1	3	2	11-15-2019	77	76	97	84	112	137	0
319	29.1	No	29.4	5	3	3	2	2019-05-11	89	99	106	96	150	137	0
320	21	Yes	27.2	1	3	2	1	2019-09-10	91	205	135	101	221	143	1
321	22.9	No	18.6	2	2	2	2	2019-07-10	75	71	85	97	119	105	0
322	28.2	Yes	21.9	3	2	3	2	11-26-2019	85	149	133	93	171	152	0
323	29	No	21.6	2	2	3	2	12-17-2019	78	100	86	85	147	123	0
324	28.7	No	23.8	2	2	3	2	10-14-2019	72	95	105	77	106	116	0
325	21.2	No	29.4	1	3	2	1	2019-04-11	82	111	103	83	147	127	0
326	29.2	No	20.7	4	2	3	2	2020-10-01	88	149	112	91	167	128	0
327	27.3	No	29.5	3	3	3	2	12-13-2019	81	131	105	87	175	130	0
328	25.7	No	28.4	2	3	3	2	2020-10-02	76	81	78	78	117	120	0
329	21	No	15.9	1	1	2	1	2019-07-10	73	101	86	86	134	114	0
330	15.2	No	17.3	2	1	1	2	2-18-2020	74	95	90	84	117	99	0
331	17.6	No	19.4	1	2	1	1	10-14-2019	96	119	103	95	129	129	1
332	18.7	No	26	1	3	1	1	10-30-2019	75	108	112	82	130	231	0
333	16.6	No	20.8	1	2	1	1	1-22-2020	84	98	76	84	121	102	0
334	24	No	27	1	3	2	1	12-16-2019	83	138	94	79	172	119	0
335	24.6	Yes	23.5	2	2	2	2	10-15-2019	85	177	117	106	186	133	0
336	22.7	No	24.7	1	2	2	1	10-17-2019	75	119	87	81	155	105	0
337	28.2	No	28	3	3	3	2	11-15-2019	79	93	110	84	121	130	0
338	24.2	No	18.8	3	2	2	2	2020-10-01	80	103	82	85	127	95	0
339	20.5	No	19.5	2	2	2	2	10-15-2019	73	122	95	92	168	104	0
340	37.2	Yes	27.1	2	3	4	2	10-21-2019	127	279	219	129	284	239	1
341	18.2	No	28.3	2	3	1	2	10-22-2019	69	114	109	85	155	134	0
342	18.5	No	18	1	1	1	1	10-17-2019	78	150	93	90	187	101	0
343	25	No	20.7	1	2	2	1	2019-04-11	81	128	91	81	135	99	0
344	30.9	No	22.9	3	2	3	2	10-25-2019	70	112	98	90	142	118	0
345	22.7	No	22.8	1	2	2	1	2019-07-11	82	136	122	98	149	134	0
346	25.7	No	19.6	4	2	3	2	10-21-2019	84	174	111	92	208	136	0
347	15.2	Yes	22.2	1	2	1	1	11-29-2019	82	142	108	91	167	124	0
348	28.5	No	22.2	2	2	3	2	2020-08-01	76	155	125	94	195	169	0
349	23	No	24.9	3	2	2	2	1-13-2020	72	89	118	76	86	134	0
350	25.5	No	25.1	3	3	3	2	2-25-2020	76	85	73	82	101	93	0
351	16.5	Yes	23.3	2	2	1	2	2019-08-11	63	134	152	73	158	152	0
352	20.2	No	21.5	1	2	2	1	1-21-2020	81	102	98	82	125	120	0
353	29.2	No	24.4	1	2	3	1	2019-10-12	93	104	110	97	118	129	1
354	22.2	No	21.6	3	2	2	2	2019-12-11	89	95	104	83	126	120	0
355	16.5	No	26.6	1	3	1	1	2019-05-11	83	124	93	83	143	104	0
356	19.5	No	18.4	1	1	1	1	10-25-2019	71	69	85	82	88	118	0
357	24.9	No	27.7	1	3	2	1	2019-06-11	78	98	106	74	129	113	0
358	19.3	No	22.8	1	2	1	1	1-13-2020	90	60	137	84	67	145	0
359	25	No	31.8	3	4	2	2	10-31-2019	82	135	113	97	143	128	0
360	17.9	No	19.2	2	2	1	2	10-30-2019	70	143	94	80	148	144	0
361	20.9	No	20.3	1	2	2	1	10-30-2019	71	101	110	85	116	116	0
362	27.5	No	24.2	1	2	3	1	2020-08-01	68	83	85	76	96	92	0
363	17.7	No	16.4	1	1	1	1	11-19-2019	73	98	99	87	119	109	0
364	18.8	No	18	1	1	1	1	11-19-2019	73	118	124	85	149	139	0
365	21.9	No	24.2	1	2	2	1	2019-04-11	78	83	74	91	110	109	0
366	27.9	No	19.4	2	2	3	2	11-25-2019	85	117	94	89	134	114	0
367	21.9	No	32.9	3	4	2	2	12-20-2019	77	100	112	85	118	124	0
368	18.6	No	26.8	1	3	1	1	1-31-2020	86	147	99	88	158	123	0
369	21.3	Yes	26.7	1	3	2	1	11-25-2019	92	71	105	95	86	105	1
370	18.4	Yes	16.8	1	1	1	1	2019-07-11	69	116	111	75	106	98	0
371	24.6	No	29.2	2	3	2	2	1-13-2020	78	99	114	73	117	124	0
372	25	No	21.1	1	2	2	1	2020-02-04	82	97	123	90	105	142	0
373	18.1	No	16	1	1	1	1	2020-04-03	70	133	86	90	162	126	0
374	26.2	Yes	33.3	1	4	3	1	3-13-2020	95	161	149	111	167	166	1
375	28.4	No	32.4	3	4	3	2	2020-09-01	82	200	151	89	206	171	1
376	30.2	No	36.9	5	4	3	2	1-15-2020	81	141	121	85	161	141	0
377	18.4	No	22.2	1	2	1	1	11-14-2019	85	150	122	89	165	133	0
378	33	No	30.2	1	4	3	1	2020-04-02	97	122	137	101	121	143	1
379	22.7	Yes	30	2	4	2	2	1-13-2020	87	115	98	80	130	119	0
380	22.9	No	25.7	1	3	2	1	1-29-2020	89	118	93	92	137	110	0
381	23.9	No	20.8	1	2	2	1	1-31-2020	92	121	102	93	136	110	1
382	24.7	Yes	22.3	2	2	2	2	11-26-2019	81	119	97	90	147	123	0
383	19.8	No	23.6	1	2	1	1	1-15-2020	82	107	97	84	135	116	0
384	19.6	Yes	24.4	1	2	1	1	11-28-2019	76	132	111	85	142	127	0
385	22	No	23.8	3	2	2	2	1-27-2020	79	73	93	79	119	134	0
386	30.4	No	33.8	1	4	3	1	3-18-2020	75	110	161	83	122	133	1
387	15.6	Yes	17.4	1	1	1	1	2019-12-12	76	70	99	82	94	124	0
388	26.7	No	23.5	2	2	3	2	2019-04-12	82	115	85	82	140	128	0
389	24.4	No	26.2	1	3	2	1	3-20-2020	71	111	90	81	155	126	0
390	19.5	Yes	23	1	2	1	1	11-29-2019	77	102	86	89	139	102	0
391	25.7	No	23.5	1	2	3	1	2020-08-01	73	65	79	83	103	103	0
392	29.9	No	33.3	2	4	3	2	1-29-2020	88	87	87	84	117	102	0
393	30.2	No	31.6	2	4	3	2	3-31-2020	70	46	55	86	124	104	0
394	17.9	No	25	1	3	1	1	3-31-2020	79	119	101	83	124	123	0
395	34.7	No	19	4	2	3	2	2020-02-04	77	121	107	82	137	134	0
396	23.4	No	27.3	2	3	2	2	2-25-2020	83	120	110	93	144	123	0
397	18.6	No	25.2	1	3	1	1	2019-12-12	73	144	123	74	167	150	0
398	25.9	No	26.2	1	3	3	1	1-21-2020	87	171	147	87	173	153	0
399	23	No	29	2	3	2	2	12-13-2019	72	127	83	81	163	115	0
400	36.8	No	25.2	3	3	4	2	2020-09-01	90	154	115	96	172	138	0
401	25.5	No	30.1	1	4	3	1	2020-09-01	116	161	121	97	150	127	1
402	13.8	No	32.4	1	4	1	1	12-20-2019	81	97	95	86	118	110	0
403	22.4	No	22.3	1	2	2	1	1-13-2020	84	131	86	81	145	89	0
404	27.5	No	32	2	4	3	2	4-23-2020	74	174	106	79	177	117	0
405	22.8	No	25	2	3	2	2	1-16-2020	77	146	115	81	156	133	0
406	22.2	No	22.1	2	2	2	2	1-22-2020	89	139	92	92	176	117	0
407	27.4	No	26	3	3	3	2	2-13-2020	74	93	84	82	127	111	0
408	20.6	No	23.5	2	2	2	2	4-30-2020	87	90	112	88	113	124	0
409	18.2	No	21.9	1	2	1	1	5-27-2020	89	152	132	96	166	125	0
410	20.1	Yes	20.2	1	2	2	1	2020-11-06	72	83	94	81	123	122	0
411	27.4	No	28.5	3	3	3	2	2-19-2020	75	119	101	77	182	133	0
412	19.6	No	30.1	2	4	1	2	2020-08-04	77	132	88	91	156	110	0
413	17.2	No	20.3	1	2	1	1	2020-05-02	80	122	100	91	121	108	0
414	18.3	No	21.8	1	2	1	1	2020-06-04	74	98	94	88	134	113	0
415	20.9	No	26.7	1	3	2	1	2020-03-06	81	145	99	87	167	139	0
416	18.4	No	19.9	2	2	1	2	2020-04-03	66	68	75	82	106	104	0
417	15.2	No	23.4	1	2	1	1	2020-03-03	81	87	91	79	111	101	0
418	17.6	No	27.6	1	3	1	1	2020-03-04	86	135	105	90	137	110	0
419	24.5	Yes	21.7	3	2	2	2	2020-07-05	80	86	79	85	102	107	0
420	19.9	Yes	18.6	1	2	1	1	2020-05-02	84	182	95	89	199	108	1
421	33.6	Yes	23.7	3	2	3	2	2-13-2020	83	130	95	91	151	115	0
422	22.8	No	33.1	2	4	2	2	2020-03-03	67	83	91	85	151	121	0
423	31.7	No	26.8	3	3	3	2	5-27-2020	97	163	124	96	162	126	1
424	16.5	No	22.1	1	2	1	1	2020-12-02	78	90	89	80	114	108	0
425	25.8	Yes	36.4	2	4	3	2	4-16-2020	104	143	115	106	152	111	1
426	19.4	Yes	22.9	1	2	1	1	2020-04-03	72	107	99	87	142	120	0
427	15.9	No	22.4	1	2	1	1	2020-08-05	83	127	120	88	127	134	0
428	28	Yes	25.2	2	3	3	2	3-20-2020	95	200	120	110	226	141	1
429	30.1	No	22.4	4	2	3	2	4-17-2020	85	127	111	93	137	122	0
430	26.3	No	21.3	1	2	3	1	2020-11-06	70	165	144	79	167	159	0
431	29.8	No	20.4	2	2	3	2	2020-04-05	85	127	85	86	158	108	0
432	17.1	No	24.9	1	2	1	1	2-26-2020	74	118	96	82	136	120	0
433	22.6	Yes	28.4	1	3	2	1	2020-04-05	76	98	82	81	107	98	0
434	39	Yes	22.5	5	2	4	2	2020-11-03	83	129	121	91	141	140	0
435	13.7	No	24.1	1	2	1	1	5-14-2020	87	85	103	90	95	113	0
436	18.6	Yes	24.2	2	2	1	2	3-13-2020	73	77	81	90	105	98	0
437	21.4	Yes	31.2	1	4	2	1	3-13-2020	69	132	138	79	153	154	0
438	19.7	No	22.6	1	2	1	1	3-18-2020	78	88	101	88	111	118	0
439	20.5	No	24	1	2	2	1	2020-07-04	79	145	101	97	159	117	0
440	34.3	No	29.5	5	3	3	2	2020-02-06	69	131	72	79	141	101	0
441	23.2	No	24	1	2	2	1	3-26-2020	74	92	109	77	108	121	0
442	23.6	No	25.1	5	3	2	2	2020-11-06	71	63	71	83	114	107	0
443	18.8	No	28.2	1	3	1	1	4-29-2020	87	132	112	93	150	111	0
444	19.3	No	20.3	1	2	1	1	2020-08-05	86	93	78	93	134	118	0
445	24.8	No	27	2	3	2	2	2020-09-06	70	110	85	80	115	92	0
446	18.4	No	24.2	1	2	1	1	4-24-2020	81	183	132	77	183	134	1
447	19.5	Yes	18.7	1	2	1	1	2020-04-05	75	172	123	85	188	175	0
448	19.9	No	27.7	1	3	1	1	2020-11-06	76	94	97	78	114	97	0
449	21.7	No	26.7	1	3	2	1	2020-11-06	91	138	117	95	160	124	0
450	21.4	No	20.3	1	2	2	1	2020-10-06	72	116	115	79	137	129	0
451	36	No	22.1	6	2	4	2	2020-12-12	74	125	122	85	166	150	0
452	30.4	No	23.2	1	2	3	1	11-21-2020	90	141	94	101	226	162	0
453	27.3	No	28.3	3	3	3	2	9-30-2020	75	132	103	88	165	122	0
454	19.9	No	25.4	1	3	1	1	2020-02-12	78	100	90	92	111	105	0
455	29	Yes	20.3	4	2	3	2	2-25-2021	88	104	107	97	119	123	0
456	45.2	Yes	24.8	2	2	4	2	2020-03-11	79	117	74	93	133	111	0
457	30.4	Yes	18.7	2	2	3	2	11-15-2020	80	135	137	80	118	130	0
458	32.2	No	23.2	1	2	3	1	10-20-2020	78	124	102	98	145	118	0
459	27.5	Yes	24	1	2	3	1	2021-12-01	68	104	83	88	163	134	0
460	20.4	No	25.9	1	3	2	1	2021-06-02	67	90	88	82	100	134	0
461	21.9	No	27.3	1	3	2	1	2020-08-12	78	88	70	88	126	98	0
462	23.5	Yes	27.1	1	3	2	1	1-19-2021	70	118	104	81	149	131	0
463	19	Yes	19.8	1	2	1	1	2021-04-03	79	149	89	87	174	112	0
464	24.5	No	26.6	2	3	2	2	10-30-2020	77	168	123	86	195	145	0
465	27.3	No	24.3	2	2	3	2	2021-05-01	76	111	84	119	156	123	0
466	27.6	Yes	25.1	2	3	3	2	2021-07-01	67	100	76	90	128	104	0
467	31.8	No	26.8	1	3	3	1	11-24-2020	68	103	102	79	139	131	0
468	28	No		4		3	2	2020-10-11	78	108	90	88	139	122	0
469	36.5	Yes	27.1	3	3	4	2	12-18-2020	78	152	106	92	169	117	0
470	40.1	No	26	3	3	4	2	10-30-2020	81	140	103	94	185	136	0
471	25.6	No	24.8	2	2	3	2	12-23-2020	68	145	56	81	170	79	0
472	26	No	31.1	1	4	3	1	2020-11-12	89	172	104	97	204	135	0
473	17.4	No	25.3	1	3	1	1	11-21-2020	91	94	93	105	121	100	0
474	29	Yes	35.3	2	4	3	2	10-28-2020	78	115	101	80	161	110	0
475	33.6	No	20.8	3	2	3	2	1-17-2021	73	113	94	92	154	125	0
476	39.7	No	30.9	4	4	4	2	10-29-2020	75	129	114	86	147	144	0
477	34.9	Yes	35.2	2	4	3	2	2020-02-12	79	167	138	90	166	154	0
478	25.1	No	16.2	2	1	3	2	2020-03-11	75	72	96	86	116	113	0
479	33.6	No	40.5	2	4	3	2	2020-06-11	84	141	103	93	161	109	0
480	21.9	No	19.7	2	2	2	2	11-23-2020	69	63	52	84	80	86	0
481	26.5	Yes	22.9	1	2	3	1	10-28-2020	73	176	144	86	172	173	0
482	29.4	No	33.2	2	4	3	2	1-15-2021	73	88	88	115	115	125	0
483	31.6	Yes	32	1	4	3	1	1-22-2021	64	102	86	81	121	118	0
484	30.4	No	34.1	1	4	3	1	2021-04-02	67	96	92	81	117	112	0
485	28.2	Yes	19.4	1	2	3	1	1-25-2021	69	101	65	83	142	97	0
486	24.8	No	22.1	2	2	2	2	12-28-2020	66	65	79	70	131	109	0
487	33.6	Yes	23.8	2	2	3	2	2020-05-12	91	114	104	114	174	157	0
488	31.7	Yes	32.5	4	4	3	2	2-25-2021	89	104	109	98	114	110	0
489	28.3	Yes	27.9	2	3	3	2	2020-02-11	78	98	97	85	175	144	0
490	23.3	No	21.4	3	2	2	2	2020-11-11	75	123	104	96	149	130	0
491	38.8	Yes	21.8	4	2	4	2	12-23-2020	80	143	116	86	164	158	0
492	25.6	Yes	26.7	1	3	3	1	10-24-2020	72	119	115	73	139	123	0
493	36.3	No	27.3	2	3	4	2	12-23-2020	81	118	88	90	138	104	0
494	34.7	Yes	37.2	2	4	3	2	2020-06-12	90	124	107	99	148	132	0
495	34.4	Yes		5		3	2	2021-05-02	76	99	81	94	130	112	0
496	24.2	Yes	26.2	2	3	2	2	11-25-2020	67	152	112	73	158	114	0
497	20.8	Yes	25.6	2	3	2	2	2021-11-02	61	133	81	96	165	100	0
498	38.2	No	22.2	2	2	4	2	2021-12-02	75	149	102	80	191	143	0
499	24.3	No	25.6	2	3	2	2	12-24-2020	76	103	95	78	125	109	0
500	18.5	No	25	1	3	1	1	2021-09-01	69	73	70	87	96	118	0
501	26.3	Yes	29.1	1	3	3	1	11-26-2020	77	109	104	88	126	119	0
502	30.4	Yes	36.7	2	4	3	2	12-28-2020	79	106	83	93	122	85	0
503	29.6	No	33.3	1	4	3	1	10-19-2020	76	117	98	89	142	114	0
504	39.4	No	32.1	3	4	4	2	2-14-2021	75	96	98	89	130	161	0
505	27	No	23.4	2	2	3	2	2020-10-11	73	147	87	93	163	124	0
506	31.5	No	24.8	2	2	3	2	2020-04-12	65	79	71	74	97	96	0
507	18.1	Yes	25.4	1	3	1	1	2020-09-11	74	95	70	84	110	83	0
508	26.1	No	18.4	1	1	3	1	2-14-2021	82	74	70	84	98	90	0
509	32.6	No	20.9	3	2	3	2	10-19-2020	69	105	103	83	136	115	0
510	27.3	No	24.7	2	2	3	2	2-15-2021	86	99	79	78	119	109	0
511	34.2	Yes	37.4	3	4	3	2	1-25-2021	70	107	105	99	159	151	0
512	20.3	No	21.9	2	2	2	2	2020-08-11	72	139	105	99	195	135	0
513	25.2	No	31.9	2	4	3	2	11-13-2020	94	221	157	109	242	172	1
514	19.2	No	23.4	1	2	1	1	2021-11-01	103	97	87	119	134	120	1
515	27.2	No	27.6	2	3	3	2	2020-11-11	86	166	110	99	231	129	0
516	18	No	22.9	1	2	1	1	2021-11-03	83	93	107	92	104	118	0
517	37.4	Yes	25.5	6	3	4	2	2021-06-03	75	132	137	84	157	151	0
518	38.7	No	29.7	3	3	4	2	3-17-2021	92	157	107	94	171	106	1
519	33.7	Yes	29.1	2	3	3	2	1-30-2021	69	107	84	101	158	118	0
520	26.3	No	30	1	4	3	1	3-20-2021	87	106	97	97	131	119	0
521	33.6	No	24.4	1	2	3	1	11-13-2020	68	145	97	75	164	131	0
522	31.6	No	21.2	1	2	3	1	12-17-2020	81	160	115	91	173	123	0
523	29	No	28.1	3	3	3	2	2020-11-11	81	155	120	85	177	127	0
524	28.8	No	27.4	3	3	3	2	2021-11-02	75	70	87	93	102	126	0
525	28.4	No	28.9	3	3	3	2	2021-11-03	84	195	184	86	195	182	1
526	25.7	No	24.7	2	2	3	2	1-29-2021	63	128	64	80	173	124	0
527	36.6	No	25.4	4	3	4	2	2021-08-01	72	102	87	91	139	122	0
528	25.9	No	21.3	2	2	3	2	2021-02-02	76	115	83	97	140	86	0
529	31.6	No	35.7	1	4	3	1	12-28-2020	80	157	92	81	151	98	0
530	35.8	Yes	27.2	4	3	4	2	2-15-2021	75	68	107	96	99	159	0
531	21.8	No	21.1	1	2	2	1	1-13-2021	74	117	96	90	161	121	0
532	29.1	No	16.8	2	1	3	2	2021-06-01	71	77	67	89	138	123	0
533	19.4	No	22.5	1	2	1	1	2020-10-12	71	57	77	85	83	104	0
534	19.2	No	21.3	1	2	1	1	1-19-2021	68	111	96	86	162	124	0
535	25.1	No	20.3	2	2	3	2	2021-11-03	80	106	97	94	143	113	0
536	35	Yes	28.9	4	3	4	2	2021-07-03	90	138	121	88	163	144	0
537	36.6	No	20.9	1	2	4	1	2021-07-01	80	116	103	97	149	138	0
538	19.7	No	24.8	2	2	1	2	2021-01-03	89	93	87	82	91	90	0
539	44.9	Yes	23.8	4	2	4	2	2021-12-03	111	201	174	124	211	175	1
540	23.8	Yes	26.1	1	3	2	1	2021-10-02	63	115	84	82	168	117	0
541	26.5	No	25.1	1	3	3	1	1-22-2021	63	102	98	78	151	140	0
542	31.9	No	29.9	1	3	3	1	2-13-2021	70	86	81	89	140	127	0
543	30.9	No	22.5	2	2	3	2	3-20-2021	80	113	90	82	119	101	0
544	17.3	No	27.7	1	3	1	1	1-23-2021	73	146	119	99	191	168	0
545	28.5	No	27	2	3	3	2	2-27-2021	91	129	117	102	146	120	0
546	29.8	Yes	30.8	2	4	3	2	3-18-2021	92	149	118	89	155	132	1
547	35.2	No	36.1	3	4	4	2	11-28-2020	80	99	68	94	142	105	0
548	22.8	No	30.3	3	4	2	2	11-30-2020	69	112	81	82	143	132	0
549	18.9	No	24.1	1	2	1	1	1-27-2021	61	131	67	70	162	89	0
550	22	No	23.4	1	2	2	1	1-26-2021	66	84	64	83	137	121	0
551	29.9	Yes	24.6	1	2	3	1	12-20-2020	81	169	135	87	195	177	0
552	24.8	Yes	35	3	4	2	2	2021-06-03	76	122	89	87	135	96	0
553	29.9	No	24.3	2	2	3	2	2021-07-04	81	158	142	85	143	154	0
554	34.6	No	28.1	2	3	3	2	3-16-2021	87	181	137	100	194	162	1
555	27.1	No	27.8	3	3	3	2	2021-08-02	66	92	76	81	133	107	0
556	36.8	No	25.2	2	3	4	2	2021-06-04	82	86	104	89	105	122	0
557	20.4	No	26.1	1	3	2	1	2020-11-12	81	93	106	94	123	134	0
558	29.7	Yes	21.1	1	2	3	1	2020-11-12	68	144	96	81	184	131	0
559	29.1	No	19.6	1	2	3	1	3-30-2021	93	209	176	98	220	175	1
560	32.3	No	27.8	4	3	3	2	1-30-2021	66	125	88	110	186	157	0
561	33.1	Yes	24.4	2	2	3	2	3-18-2021	112	274	216	112	265	177	1
562	34.4	No		3		3	2	2021-08-01	74	114	112	88	171	139	0
563	34.5	Yes	29.7	2	3	3	2	3-20-2021	80	96	101	84	132	106	0
564	23.3	No	25	1	3	2	1	3-22-2021	77	88	76	77	90	76	0
565	18.8	No	30.8	1	4	1	1	1-14-2021	64	52	77	85	102	106	0
566	18.4	No	17.9	1	1	1	1	2-19-2021	80	105	90	80	117	125	0
567	34.7	No	21.6	1	2	3	1	2021-10-01	64	120	80	87	171	138	0
568	35	No	27.1	5	3	4	2	2021-01-03	74	105	120	78	126	143	0
569	34.1	Yes	29.6	3	3	3	2	4-14-2021	84	158	142	78	164	151	0
570	18.5	No	31.2	1	4	1	1	2021-04-03	76	111	102	81	137	136	0
571	28.5	No	27.5	1	3	3	1	2021-09-03	78	134	92	82	136	113	0
572	18.9	Yes	21.9	1	2	1	1	12-23-2020	87	100	98	94	143	130	0
573	28.5	Yes	32.5	3	4	3	2	3-26-2021	94	205	109	95	208	98	1
574	27.8	Yes	22.8	2	2	3	2	12-29-2020	79	74	77	87	86	74	0
575	22.5	No	26	1	3	2	1	3-17-2021	95	160	110	98	171	121	1
576	28	No	22.1	3	2	3	2	2-27-2021	91	151	116	105	145	122	0
577	27	Yes	28.1	3	3	3	2	2021-10-04	78	130	109	86	130	114	0
578	26.3	Yes	34.9	1	4	3	1	12-31-2020	89	145	135	90	187	142	0
579	36.8	Yes	21.6	2	2	4	2	2021-08-01	76	141	139	88	162	172	0
580	25.8	No	23.6	3	2	3	2	4-27-2021	68	109	102	76	121	106	0
581	34.3	Yes	25.8	2	3	3	2	2021-10-04	85	132	99	86	124	104	0
582	31.6	Yes	26.8	1	3	3	1	2021-06-02	79	154	142	100	198	200	0
583	31.6	No	31	4	4	3	2	2021-03-05	91	161	128	101	168	130	0
584	30.2	No	26.8	1	3	3	1	4-24-2021	85	172	126	86	164	135	0
585	20.6	No	31.6	1	4	2	1	2021-06-01	73	67	85	96	108	129	0
586	21.9	Yes	28.9	1	3	2	1	2021-08-02	70	89	86	84	103	117	0
587	37.3	No	27.8	3	3	4	2	2021-03-02	72	115	101	90	167	108	0
588	28.4	Yes	28.5	2	3	3	2	3-13-2021	79	109	115	85	140	128	0
589	32.5	Yes	20.9	2	2	3	2	4-13-2021	93	116	112	91	130	138	1
590	29.1	No	17.6	2	1	3	2	2-22-2021	81	80	96	84	99	106	0
591	38.4	No	23.1	1	2	4	1	4-23-2021	82	85	100	86	109	114	0
592	20.2	No	29.8	1	3	2	1	1-14-2021	73	95	96	87	110	113	0
593	34.7	No	28.6	2	3	3	2	2021-09-04	87	151	113	98	150	134	0
594	33.5	Yes	30	4	4	3	2	2021-10-05	83	173	167	98	180	159	1
595	29.9	Yes	23.7	2	2	3	2	4-17-2021	90	177	144	93	183	145	0
596	28.7	No	20.8	1	2	3	1	5-25-2021	82	91	107	95	108	119	0
597	21.2	No	25.6	1	3	2	1	1-29-2021	63	79	79	90	124	164	0
598	26.8	No	24.8	1	2	3	1	2021-12-03	83	163	104	89	181	131	0
599	25.9	Yes	26.3	1	3	3	1	1-31-2021	77	156	100	100	177	128	0
600	23.6	No	18.8	1	2	2	1	4-13-2021	88	173	141	87	176	153	0
601	35.5	No	30.4	1	4	4	1	2-18-2021	87	152	85	89	176	109	0
602	32.6	Yes	28.6	2	3	3	2	4-20-2021	79	136	100	96	128	108	0
603	21.8	No	23.9	1	2	2	1	1-20-2021	68	91	61	71	144	107	0
604	30.4	No	19.8	2	2	3	2	2021-08-06	78	167	108	83	172	118	0
605	27.6	No	25.9	2	3	3	2	1-20-2021	74	145	111	94	184	141	0
606	28	No		1		3	1	2021-08-04	80	104	99	89	124	108	0
607	22.2	No	22.9	1	2	2	1	5-22-2021	79	96	96	88	112	101	0
608	37.9	Yes	23.8	2	2	4	2	5-16-2021	71	107	100	75	106	113	0
609	23.3	Yes	30.6	5	4	2	2	4-27-2021	86	179	128	90	172	128	0
610	24.8	No	26.6	3	3	2	2	2021-02-05	84	179	118	91	189	176	0
611	35.2	No	27.3	4	3	4	2	2-15-2021	81	138	108	85	174	139	0
612	34.1	No	17.9	1	1	3	1	2021-03-02	69	94	67	87	133	111	0
613	23.5	No	19.4	2	2	2	2	3-21-2021	79	110	96	86	111	93	0
614	25.1	No	29	1	3	3	1	3-29-2021	74	102	93	83	100	94	0
615	18.7	No	24.7	2	2	1	2	2021-09-04	76	100	95	77	102	86	0
616	31.5	Yes	39.3	1	4	3	1	5-16-2021	71	135	88	84	151	97	0
617	36.4	No	19.7	1	2	4	1	4-20-2021	71	106	135	86	102	149	0
618	37.9	No	20.5	1	2	4	1	2-18-2021	79	109	85	77	117	116	0
619	32.3	No		2		3	2	4-16-2021	93	172	130	87	159	124	1
620	22.8	No	40.7	1	4	2	1	1-24-2021	64	88	73	107	208	95	0
621	37.1	Yes	25.3	2	3	4	2	5-19-2021	81	121	146	65	125	100	0
622	27.5	Yes	24.5	1	2	3	1	5-29-2021	85	180	84	89	191	105	1
623	19	No	22.6	2	2	1	2	2021-05-02	71	74	76	98	92	103	0
624	22.3	No	31.2	1	4	2	1	2021-06-07	94	120	126	99	125	138	1
625	21.6	No	29.1	1	3	2	1	3-18-2021	83	68	107	74	81	113	0
626	27.6	No	22.8	2	2	3	2	2021-07-04	79	153	116	86	167	139	0
627	18.5	No	24.6	1	2	1	1	2021-11-04	72	88	87	85	90	107	0
628	34.3	Yes	24.8	2	2	3	2	4-30-2021	82	152	64	86	176	91	0
629	25.8	No	27.3	1	3	3	1	2021-01-04	75	92	101	80	106	111	0
630	18.6	No	20.5	1	2	1	1	2021-04-04	76	62	80	73	60	83	0
631	31.3	No	27.8	1	3	3	1	5-26-2021	83	97	92	97	138	123	0
632	27.4	No	27.5	1	3	3	1	2-19-2021	80	122	99	86	164	127	0
633	40.7	Yes	27.4	2	3	4	2	4-21-2021	87	165	160	87	166	168	1
634	17.4	No	20.4	1	2	1	1	2021-08-03	84	102	95	93	123	119	0
635	18.7	No	17.2	1	1	1	1	2021-09-05	86	138	131	92	152	129	0
636	30.2	Yes	26.6	2	3	3	2	4-28-2021	84	129	107	82	138	109	0
637	26.2	Yes	27.5	1	3	3	1	4-19-2021	91	197	160	90	207	152	1
638	28	Yes	20.9	1	2	3	1	5-26-2021	75	150	119	86	181	133	0
639	16.9	No	21.3	1	2	1	1	5-16-2021	93	140	104	97	129	93	1
640	30.7	Yes	26	5	3	3	2	2-14-2021	78	112	94	97	146	127	0
641	21.3	No	22.9	1	2	2	1	2-15-2021	71	106	69	93	132	92	0
642	34.4	No	23.3	1	2	3	1	4-23-2021	80	166	146	90	204	139	0
643	28.2	No	25.3	2	3	3	2	3-21-2021	92	201	158	93	205	169	1
644	22.2	No	19.3	1	2	2	1	2021-04-02	70	117	114	82	138	135	0
645	23.2	No	28	2	3	2	2	2021-07-05	85	114	92	93	120	100	0
646	21	No	27	1	3	2	1	2021-11-06	80	121	128	86	125	138	0
647	20.8	No	25.3	1	3	2	1	3-18-2021	84	98	100	81	100	102	0
648	31.8	No	32.4	2	4	3	2	2021-03-05	79	137	96	93	165	129	0
649	28.3	Yes	23.1	2	2	3	2	6-17-2021	85	132	146	92	131	155	0
650	30.6	Yes	27	1	3	3	1	2021-02-05	78	165	127	90	171	128	0
651	21.3	No	21.3	1	2	2	1	5-27-2021	75	138	93	84	156	113	0
652	23.7	No	26.8	1	3	2	1	2-21-2021	93	113	102	108	145	111	1
653	35.7	No	18.3	3	1	4	2	2021-09-03	82	116	92	83	138	104	0
654	27.8	Yes	24.8	2	2	3	2	2021-12-05	77	139	131	94	145	141	0
655	29.4	No	26.9	3	3	3	2	2021-08-05	87	120	115	90	119	123	0
656	20.2	Yes	24.4	1	2	2	1	2021-06-04	92	151	164	89	147	138	1
657	23.2	Yes	38.5	1	4	2	1	3-21-2021	106	171	151	104	174	156	1
658	31.5	Yes	22.5	1	2	3	1	2021-08-05	79	160	92	94	151	106	0
659	36.8	Yes	24.2	3	2	4	2	2021-05-03	91	167	159	100	192	182	1
660	30.9	Yes	16.2	1	1	3	1	5-29-2021	81	109	69	83	121	86	0
661	22.7	No		2		2	2	2021-12-05	87	105	91	102	120	104	0
662	30.5	No	26.3	2	3	3	2	5-17-2021	76	126	80	93	146	137	0
663	30.7	No	27.3	4	3	3	2	2021-02-07	89	201	165	98	186	173	1
664	26.9	No	23.2	4	2	3	2	2021-07-03	84	109	103	93	130	128	0
665	23.6	No	25.4	1	3	2	1	3-24-2021	91	129	154	101	134	158	1
666	32.1	Yes	29.3	1	3	3	1	6-23-2021	90	191	154	101	187	158	1
667	25.6	No	32.5	1	4	3	1	2021-02-06	75	146	138	93	149	132	0
668	23.9	No	25.7	3	3	2	2	3-17-2021	94	166	117	91	171	113	1
669	23.5	No	32	2	4	2	2	2-28-2021	90	175	125	103	189	153	0
670	26.5	No	23.4	3	2	3	2	2021-05-05	80	130	91	88	133	93	0
671	24.2	No	23.5	1	2	2	1	2021-04-07	88	116	113	86	112	118	0
672	27.1	No	32.5	1	4	3	1	5-18-2021	87	162	137	100	168	140	0
673	28.1	Yes	27.1	2	3	3	2	2021-09-04	77	136	114	86	149	133	0
674	29.3	No	21.4	2	2	3	2	2021-12-03	82	95	80	86	134	100	0
675	22.5	Yes	21.6	1	2	2	1	2-26-2021	94	142	130	98	158	152	1
676	26.9	No	34.4	1	4	3	1	5-17-2021	87	191	109	89	174	118	1
677	30.6	No	23.7	1	2	3	1	5-30-2021	82	97	83	88	128	110	0
678	34.3	No	27.3	1	3	3	1	2021-12-05	75	144	97	86	156	104	0
679	31.4	Yes	28.4	2	3	3	2	7-22-2021	72	126	95	95	164	134	0
680	28.4	No	22.8	2	2	3	2	3-22-2021	77	139	115	92	155	114	0
681	25.5	No	36.9	1	4	3	1	2021-08-05	79	194	91	91	199	91	1
682	23.9	No	32.4	3	4	2	2	2021-01-07	86	125	100	92	145	109	0
683	37	No	22.6	3	2	4	2	2021-07-06	83	110	94	101	144	122	0
684	32.7	No	26	2	3	3	2	6-13-2021	79	132	149	92	144	157	0
685	32.7	No	27.2	1	3	3	1	2021-04-06	79	131	93	87	146	108	0
686	30	Yes	25	1	3	3	1	2021-06-06	86	151	120	92	150	135	0
687	25.2	No	21.9	1	2	3	1	6-22-2021	87	152	126	88	157	126	0
688	37.1	No	34.5	1	4	4	1	3-22-2021	96	166	171	109	177	186	1
689	29	No	25.6	1	3	3	1	5-16-2021	90	167	196	93	167	202	1
690	30	No	28.6	1	3	3	1	6-16-2021	80	117	115	91	126	130	0
691	25	No	27.6	2	3	2	2	6-13-2021	80	114	134	88	126	140	0
692	30.6	Yes	28.3	2	3	3	2	2021-06-07	76	144	136	89	159	141	0
693	25.4	No	23.2	1	2	3	1	6-17-2021	85	81	131	89	83	130	0
694	35.5	No	31.9	2	4	4	2	3-29-2021	73	147	121	80	147	124	0
695	28.4	No	26.2	2	3	3	2	2021-08-07	87	111	110	97	138	134	0
696	30.1	No	25.4	1	3	3	1	5-31-2021	93	170	119	102	190	130	1
697	25.5	No	23.4	2	2	3	2	6-14-2021	77	70	85	87	115	112	0
698	23.6	No	18.9	1	2	2	1	2021-12-05	74	59	103	79	92	116	0
699	32.2	No	25.4	3	3	3	2	3-19-2021	89	128	106	93	140	106	0
700	27.4	No	34.6	1	4	3	1	3-26-2021	93	209	125	92	211	139	1
701	28.4	Yes	25.1	1	3	3	1	2021-10-04	71	140	99	75	127	99	0
702	25.3	No	25.5	1	3	3	1	5-26-2021	72	76	74	89	107	105	0
703	24	No	29	1	3	2	1	2021-12-07	94	159	135	112	183	160	1
704	24.4	Yes	22.7	2	2	2	2	5-30-2021	81	126	112	80	128	120	0
705	29.3	Yes	26.1	1	3	3	1	6-25-2021	82	200	105	85	202	107	1
706	20.8	No	32	1	4	2	1	3-25-2021	85	113	107	85	131	115	0
707	35.9	Yes	20.3	2	2	4	2	2021-08-05	81	118	105	87	145	124	0
708	32.7	No	21.1	1	2	3	1	4-17-2021	76	69	94	84	69	117	0
709	25.2	No	27.1	1	3	3	1	6-13-2021	81	184	168	82	189	185	1
710	27.2	No	32	3	4	3	2	5-27-2021	82	153	103	97	166	119	0
711	40.6	Yes	24.5	4	2	4	2	5-16-2021	76	167	157	79	163	152	1
712	27.8	Yes	29.6	1	3	3	1	2021-04-07	88	151	154	89	160	154	1
713	32.6	Yes	33.3	2	4	3	2	2021-03-09	87	103	108	97	129	138	0
714	20.4	No	23.3	1	2	2	1	2021-01-07	69	120	131	79	131	144	0
715	29.8	Yes	33.3	1	4	3	1	2021-10-04	88	161	166	92	168	160	1
716	21.3	No	23.2	1	2	2	1	3-29-2021	77	60	90	82	83	114	0
717	37.8	Yes	30.3	2	4	4	2	4-19-2021	81	115	138	81	121	176	0
718	38.2	Yes	23.5	3	2	4	2	2021-10-04	86	154	104	79	174	124	0
719	24.4	No	26	1	3	2	1	2021-11-04	96	182	148	103	178	146	1
720	28.9	Yes	25.8	2	3	3	2	5-15-2021	86	157	103	94	153	124	0
721	16.9	No	27.3	1	3	1	1	6-29-2021	74	76	95	79	101	113	0
722	25.2	No	22.5	1	2	3	1	6-23-2021	75	100	118	88	134	117	0
723	35.4	No	22.3	1	2	4	1	7-18-2021	86	109	110	87	110	133	0
724	22	No	25.8	1	3	2	1	2021-02-07	77	114	100	92	135	120	0
725	19.8	No	26.7	3	3	1	2	7-19-2021	79	117	85	89	158	115	0
726	30.7	No	29.1	2	3	3	2	6-26-2021	81	198	109	88	201	109	1
727	27.3	No	27	2	3	3	2	5-22-2021	88	138	119	87	137	122	0
728	31.7	Yes	28.1	1	3	3	1	5-24-2021	82	129	104	94	140	107	0
729	21.8	No	15.4	1	1	2	1	4-30-2021	72	83	89	88	95	122	0
730	27.3	No	26.8	3	3	3	2	6-27-2021	93	121	126	90	121	137	1
731	21.5	No	19.6	1	2	2	1	3-24-2021	89	119	77	93	131	68	0
732	35.2	No	28.9	2	3	4	2	5-27-2021	83	118	83	100	132	104	0
733	28.8	No	33.4	1	4	3	1	7-15-2021	87	148	134	96	211	150	0
734	31.6	Yes	35.1	1	4	3	1	4-20-2021	84	178	137	84	162	127	0
735	28.7	Yes	32.8	1	4	3	1	7-22-2021	81	112	149	99	122	155	0
736	19	No	24	1	2	1	1	7-24-2021	82	89	118	81	104	130	0
737	30.3	Yes	26.4	2	3	3	2	7-21-2021	80	122	97	97	134	115	0
738	22.9	No	27.9	1	3	2	1	7-17-2021	84	133	117	89	156	130	0
739	33.8	No	24	2	2	3	2	2021-08-06	72	147	115	82	185	145	0
740	29.8	No	20.4	4	2	3	2	6-20-2021	87	137	136	89	130	138	0
741	25.1	Yes	24.5	1	2	3	1	2021-02-07	101	253	236	115	263	247	1
742	27.5	No	23.1	4	2	3	2	2021-08-08	80	76	77	87	100	99	0
743	29.4	Yes	27.1	2	3	3	2	2021-10-06	75	159	95	84	147	99	0
744	26	No	35.9	2	4	3	2	2021-06-07	74	92	99	80	110	109	0
745	39	No	23.6	2	2	4	2	2021-06-05	93	194	145	97	213	151	1
746	30.5	Yes	30	2	4	3	2	5-16-2021	84	176	121	110	177	118	0
747	42.1	No	34.2	2	4	4	2	2021-08-06	96	225	180	109	211	175	1
748	21.9	No	23.7	2	2	2	2	2021-10-07	74	86	109	79	107	130	0
749	34.9	Yes	21.5	1	2	3	1	2021-01-08	76	141	103	71	167	165	0
750	34.8	No	20.2	1	2	3	1	5-29-2021	72	104	94	73	133	109	0
751	17.4	No	16.6	1	1	1	1	6-14-2021	101	131	115	103	134	129	1
752	24.1	Yes	21.9	1	2	2	1	2021-07-08	109	206	163	144	207	163	1
753	31.1	Yes	31.9	2	4	3	2	7-27-2021	92	132	85	101	148	95	1
754	29	No	28.4	2	3	3	2	2021-11-08	64	126	106	80	179	120	0
755	31.6	Yes	28.3	2	3	3	2	5-15-2021	90	256	197	91	253	217	1
756	37.2	Yes	17.1	2	1	4	2	2021-06-06	82	105	106	91	178	121	0
757	18.4	No	22.9	1	2	1	1	8-16-2021	76	102	103	84	129	113	0
758	22.5	Yes	26.1	2	3	2	2	2021-03-05	81	164	142	97	166	160	0
759	32.3	No	21.6	2	2	3	2	2021-01-06	86	123	130	91	140	122	0
760	26.8	Yes	21.6	2	2	3	2	2021-04-08	74	105	96	80	135	106	0
761	36.1	Yes	24.1	5	2	4	2	2021-05-05	92	142	105	97	147	117	1
762	27.3	No	21	1	2	3	1	5-21-2021	72	163	120	84	161	129	0
763	28.4	No	30.3	1	4	3	1	2021-06-08	86	126	122	96	141	138	0
764	31.5	No	28.8	1	3	3	1	2021-05-06	90	162	127	99	176	128	0
765	32	No	30.4	4	4	3	2	6-21-2021	83	145	103	93	179	120	0
766	37.1	Yes	19.5	2	2	4	2	8-19-2021	66	91	76	81	134	108	0
767	30.1	No	22.3	1	2	3	1	2021-12-07	77	65	74	97	96	112	0
768	35.5	No	29.6	3	3	4	2	6-13-2021	81	162	126	89	178	150	0
769	28.9	No	32.7	4	4	3	2	2021-11-09	78	130	88	77	136	110	0
770	26.1	No	26.5	1	3	3	1	2021-06-08	84	120	91	78	153	105	0
771	38.5	Yes	20.7	3	2	4	2	2021-07-09	79	114	137	100	148	180	0
772	21.6	Yes	21.8	1	2	2	1	8-16-2021	78	108	110	88	127	123	0
773	27.8	No	23.1	2	2	3	2	5-19-2021	88	131	107	101	138	127	0
774	32.2	No	25.8	1	3	3	1	8-16-2021	73	96	94	87	134	130	0
775	30.6	No	19.5	3	2	3	2	6-20-2021	78	151	94	90	168	114	0
776	31.3	No	36.8	1	4	3	1	2021-10-08	80	146	108	81	167	116	0
777	33.6	No		2		3	2	9-18-2021	86	147	104	86	156	112	0
778	33.4	No	25.6	2	3	3	2	2021-05-09	70	122	117	81	146	124	0
779	26.3	No	25.9	2	3	3	2	2021-05-08	77	157	96	92	161	108	0
780	32.5	No	23.5	3	2	3	2	2021-01-09	79	86	115	97	99	148	0
781	20.1	No	28.9	1	3	2	1	5-25-2021	88	139	123	96	156	150	0
782	42.2	Yes	23.4	2	2	4	2	8-29-2021	76	140	129	85	163	152	0
783	25.9	No	24.6	1	2	3	1	2021-04-07	80	102	93	80	104	109	0
784	24.8	Yes	32.4	1	4	2	1	2021-01-06	75	169	88	81	167	96	0
785	23	No	23.2	1	2	2	1	2021-11-08	63	82	88	75	110	130	0
786	28.4	No	28.1	1	3	3	1	7-22-2021	81	175	152	100	206	177	0
787	27.4	No	34.3	1	4	3	1	2021-03-06	72	104	110	86	130	117	0
788	23.8	No	34.1	1	4	2	1	7-21-2021	88	136	128	94	152	142	0
789	19.4	Yes	18.3	1	1	1	1	6-20-2021	76	74	100	89	91	118	0
790	30.4	Yes		2		3	2	8-25-2021	76	112	115	94	132	131	0
791	22.1	No	20.8	1	2	2	1	2021-07-08	76	167	162	86	170	165	1
792	27.6	Yes	19.6	4	2	3	2	2021-08-06	78	167	108	83	172	118	0
793	17.6	No	22.7	1	2	1	1	2021-06-06	82	102	107	91	129	137	0
794	22.1	Yes	26.4	1	3	2	1	6-19-2021	81	125	100	83	143	119	0
795	31.6	No	26.4	1	3	3	1	2021-11-09	84	116	104	94	141	135	0
796	21.7	No	25.3	1	3	2	1	9-24-2021	70	103	96	90	123	115	0
797	28.1	No	28	3	3	3	2	2021-12-07	88	109	81	100	147	121	0
798	18.1	No	21.9	1	2	1	1	8-28-2021	82	115	127	92	120	133	0
799	23.6	Yes	28.9	1	3	2	1	7-29-2021	85	162	122	93	190	131	0
800	24.1	Yes	30.8	1	4	2	1	9-22-2021	75	121	113	99	144	128	0
801	22.9	No	28.9	1	3	2	1	2021-09-09	111	175	118	123	207	134	1
802	40.4	Yes	29.7	4	3	4	2	2021-07-08	86	179	109	90	198	125	0
803	33.5	No	22.3	1	2	3	1	2021-04-09	80	125	95	96	135	111	0
804	20.5	Yes	25.2	2	3	2	2	2021-12-07	76	110	103	94	156	139	0
805	33.6	Yes	25.8	2	3	3	2	9-15-2021	88	126	104	93	153	133	0
806	34.7	No	20.1	1	2	3	1	7-17-2021	87	128	109	94	153	127	0
807	20.1	No	22.6	1	2	2	1	2021-01-09	71	85	71	91	107	105	0
808	24.9	No	20.6	2	2	2	2	2021-02-08	79	126	98	83	150	110	0
809	36.5	Yes	38.9	1	4	4	1	8-21-2021	73	98	96	82	121	117	0
810	19.3	No	24.4	1	2	1	1	8-29-2021	79	130	88	89	159	108	0
811	28.7	Yes	20.3	1	2	3	1	6-29-2021	71	126	70	77	145	101	0
812	36.1	No	36.6	2	4	4	2	6-16-2021	73	135	121	82	138	136	0
813	23.3	No	21.8	1	2	2	1	2021-08-09	89	141	81	96	179	104	0
814	27.9	No	31.6	4	4	3	2	9-20-2021	78	80	96	92	119	124	0
815	22.2	No	22.6	1	2	2	1	9-17-2021	77	69	75	87	88	93	0
816	26.7	No	29.7	2	3	3	2	6-30-2021	77	144	84	87	172	96	0
817	28.7	No	21	2	2	3	2	2021-07-07	89	127	114	99	139	126	0
818	29.8	No	23.4	3	2	3	2	2021-03-09	92	124	89	101	136	107	1
819	35.5	Yes	23.1	2	2	4	2	8-14-2021	82	112	112	90	144	137	0
820	36.9	No	26.7	3	3	4	2	2021-06-07	85	101	96	92	117	113	0
821	33.2	No	30.7	5	4	3	2	8-13-2021	88	174	131	86	182	137	0
822	18.9	No	19.5	2	2	1	2	6-30-2021	76	82	130	89	98	143	0
823	30.1	No		1		3	1	6-29-2021	74	123	141	80	117	148	0
824	16.4	No	21.1	1	2	1	1	9-25-2021	80	106	115	84	122	132	0
825	21.6	No	20.5	1	2	2	1	8-25-2021	85	125	120	95	138	142	0
826	24.9	Yes	25.3	2	3	2	2	8-29-2021	84	143	115	93	173	132	0
827	25.9	Yes	23.7	1	2	3	1	2021-07-09	73	106	78	98	160	119	0
828	33.1	No	26.4	1	3	3	1	9-23-2021	85	124	119	100	162	143	0
829	17.5	No	17.4	1	1	1	1	7-18-2021	67	84	68	86	92	85	0
830	26.4	No	21	3	2	3	2	6-30-2021	72	120	102	86	131	115	0
831	24.7	No	21.6	1	2	2	1	2021-02-07	69	154	112	81	164	123	0
832	26.5	No	23.8	1	2	3	1	2021-02-07	80	126	123	93	134	137	0
833	34	No	30	2	4	3	2	9-25-2021	78	131	124	82	152	140	0
834	30.1	Yes	27.5	1	3	3	1	2021-11-08	75	166	135	86	189	137	0
835	26	Yes	22.5	1	2	3	1	7-22-2021	74	85	99	88	100	113	0
836	37.4	Yes	34.6	3	4	4	2	8-29-2021	92	180	183	104	206	189	1
837	22	No	25.5	1	3	2	1	2021-12-08	76	93	72	85	112	77	0
838	34.6	Yes	30.9	3	4	3	2	7-15-2021	96	140	125	101	156	132	1
839	27.1	No	25.7	4	3	3	2	2021-09-08	76	94	123	85	98	133	0
840	32.8	Yes	28.9	3	3	3	2	8-21-2021	87	107	99	99	127	115	0
841	20.5	Yes	24.2	1	2	2	1	2021-12-09	60	86	65	82	120	96	0
842	21.2	No	23.7	2	2	2	2	8-14-2021	81	145	121	85	178	142	0
843	37.7	Yes	21.6	2	2	4	2	2021-10-08	80	173	141	80	160	141	0
844	19.6	No	19.2	1	2	1	1	9-24-2021	79	120	112	95	148	131	0
845	26.6	No	21.9	1	2	3	1	8-21-2021	77	109	92	88	124	105	0
846	21.2	No	20	2	2	2	2	2021-07-08	82	90	103	98	105	133	0
847	25	No	28.6	4	3	2	2	8-27-2021	83	169	125	92	186	136	0
848	34.7	No	19.7	2	2	3	2	2021-06-08	77	142	113	80	144	141	0
849	30.1	No	31.1	1	4	3	1	2021-07-08	91	179	134	93	186	132	0
850	18.9	No	26.6	1	3	1	2	9-27-2021	69	121	102	90	143	133	0
851	31.7	No	33.6	3	4	3	2	9-17-2021	94	128	113	105	153	120	1
852	32.7	No	18.6	3	2	3	2	9-17-2021	79	107	97	91	140	109	0
853	26.6	No	25.7	1	3	3	1	8-26-2021	88	138	103	83	166	124	0
854	16.1	No	19.1	1	2	1	1	2021-08-09	80	123	82	93	148	122	0
855	29.8	Yes	31.5	1	4	3	2	9-23-2021	82	140	138	91	156	151	0
856	28.2	No	28.7	2	3	3	2	9-28-2021	84	127	116	95	148	138	0
857	32.1	No	18.2	1	1	3	1	2021-04-03	69	127	100	89	170	146	0
858	21.1	Yes	20.4	1	2	2	1	6-17-2021	63	103	118	90	129	145	0
859	24.5	Yes	25	3	3	2	2	2021-11-03	74	86	98	92	87	125	0
860	40.1	No	22.8	2	2	4	2	2021-11-03	74	88	82	93	72	115	0
861	20.3	No	18.9	2	2	2	2	2021-11-03	76	68	63	91	108	102	0
862	29.3	No		2		3	2	3-18-2021	75	100	105	62	97	97	0
863	19.4	No		1		1	1	3-25-2021	73	84.2	130	92	115	127	0
864	32.5	No	25.9	4	3	3	2	3-18-2021	78	126	137	90	161	147	0
865	33.2	No	21.3	4	2	3	2	3-25-2021	64	142	122	77	165	122	0
866	19.9	No	25.3	1	3	1	1	3-25-2021	95	110	102	130	118	118	1
867	16	No	24.6	1	2	1	1	2021-01-04	73	75.5	82	82	125	110	0
868	33.8	No	23.8	1	2	3	1	4-15-2021	67	134.7	148	89	171	167	0
869	21	Yes	24.4	1	2	2	1	4-15-2021	80	132.8	128	87	142	132	0
870	21.1	No	38.6	1	4	2	1	4-15-2021	68	126	85	87	160	113	0
871	22.6	No	26.2	2	3	2	2	2021-06-05	65	117.9	112	80	147	140	0
872	22.1	No	26.7	3	3	2	2	4-15-2021	80	195.5	112	95	177	183	1
873	23.9	No	22.5	1	2	2	1	4-29-2021	64	79.8	79	79	124	111	0
874	19.6	Yes	17.8	1	1	1	1	4-22-2021	75	118.9	93	84	134	110	0
875	23.8	No	27.5	2	3	2	2	4-22-2021	85	123	114	96	176	162	0
876	19	No	17.1	1	1	1	1	4-29-2021	72	131.8	72	87	146	87	0
877	29.6	Yes	26.8	1	3	3	1	5-20-2021	97	116.6	122	103	129	134	1
878	17.7	No	27.3	1	3	1	1	6-24-2021	77	93	70	101	148	107	0
879	37.8	No	28.8	5	3	4	2	5-27-2021	71	97.9	113	80	124	116	0
880	29.5	Yes	34.2	2	4	3	2	5-27-2021	72	134.5	145	79	156	163	0
881	15.6	Yes	32.9	1	4	1	1	5-27-2021	50	92.7	105	84	114	135	0
882	21.2	No		1		2	1	2021-03-06	82	110.9	77	91	117	108	0
883	29.5	No	24.6	3	2	3	2	5-27-2021	63	114.1	103	76	120	125	0
884	22.7	No	24	2	2	2	2	5-27-2021	63	115.6	109	74	138	121	0
885	27	No	26	2	3	3	2	2021-10-06	72	119	127	92	156	146	0
886	16.7	No	21.1	1	2	1	1	6-24-2021	79	92	65	96	133	104	0
887	21.2	No	24.7	2	2	2	2	7-15-2021	73	138	122	86	166	146	0
888	24	Yes	25.4	3	3	2	2	2021-08-07	76	98	166	92	120	172	1
889	18.1	Yes		1		1	1	2021-08-07	79	94.8	93	85	108	100	0
890	20.9	No	19	1	2	2	1	6-17-2021	61	110	102	82	143	136	0
891	21.7	No	23.2	1	2	2	1	6-24-2021	71	94	79	92	123	119	0
892	31.5	No	33.7	3	4	3	2	7-15-2021	80	114.1	89	87	136	108	0
893	24.3	No	18.1	3	1	2	2	7-15-2021	78	94.8	104	88	119	127	0
894	22.2	No	18.7	2	2	2	2	2021-08-07	68	61.7	57	98	100	109	0
895	21.3	No	24	1	2	2	1	7-15-2021	68	88.2	87	79	120	126	0
896	25.6	Yes	38.8	1	4	3	1	7-15-2021	85	121.7	110	95	144	118	0
897	22.4	No	18.3	1	1	2	1	7-29-2021	65	91	75	85	149	129	0
898	16.5	Yes	23.7	1	2	1	1	8-26-2021	67	90.8	84	86	125	103	0
899	30.3	Yes	21.3	4	2	3	2	8-26-2021	73	113.1	91	88	148	118	0
900	15.9	No	21.8	1	2	1	1	8-26-2021	73	94.5	89	97	145	102	0
901	25.2	No	25.9	1	3	3	1	2021-11-03	65	130	89	81	161	126	0
902	21.9	No	19.1	1	2	2	1	2021-04-03	76	142.8	123	83	172	161	0
903	34.7	No	20.6	2	2	3	2	2021-04-03	76	133.3	126	80	170	159	0
904	31.6	Yes	27	1	3	3	1	3-25-2021	84	160	174	101	176	166	1
905	27.8	No	27.1	1	3	3	1	2021-04-03	68	105.2	164	95	147	183	1
906	37.5	No		2		4	2	4-22-2021	80	111.9	104	82	137	115	0
907	19.1	No	22.5	2	2	1	2	3-18-2021	69	89	77	68	113	105	0
908	26	No	38.1	1	4	3	1	3-18-2021	96	148	137	93	206	145	1
909	17.1	No	25.9	1	3	1	1	6-17-2021	65	97	87	89	74	119	0
910	38.6	No	27.4	1	3	4	1	3-25-2021	69	157	121	83	167	132	0
911	17.1	No	20.4	1	2	1	1	3-25-2021	80	116	109	112	130	111	0
912	27.8	Yes	41.3	1	4	3	1	2021-01-04	87.4	124.5	119	102	131	136	0
913	20.1	No	21.1	3	2	2	2	2021-01-04	72	99.6	84	84	116	105	0
914	26.1	No	25.9	2	3	3	2	2021-08-04	80	176	116	90	181	146	0
915	24.6	No	23.7	1	2	2	1	2021-01-04	72	112.3	82	84	146	103	0
916	32.7	No	29.3	2	3	3	2	2021-01-04	80	83.7	95	86	155	117	0
917	19.1	No	18.9	1	2	1	2	4-29-2021	97	95.3	120	94	105	131	1
918	19.2	No	27.3	3	3	1	2	4-29-2021	96	120.3	129	94	157	132	1
919	16.9	No	19.7	1	2	1	1	5-20-2021	72	126.6	101	83	144	105	0
920	18.4	Yes	25.7	1	3	1	1	2021-03-06	91	98.4	83	83	108	116	0
921	27.9	No	43.5	2	4	3	2	2021-03-06	87	170	120	103	185	131	0
922	27	No		3		3	2	2021-03-06	100	127.1	96	103	151	130	1
923	17.8	No	20	1	2	1	1	6-17-2021	69	101	100	91	156	136	0
924	32.3	No	24.1	4	2	3	2	2021-01-07	69	72.3	76	88	110	107	0
925	18.6	No	24	1	2	1	1	2021-01-07	74	159.4	164	89	173	193	1
926	22.2	No	22.5	1	2	2	1	2021-01-07	78	129.6	127	98	149	144	0
927	17	No		1		1	1	7-29-2021	89	128	129	95	160	152	0
928	36.9	Yes	26.7	9	3	4	1	2021-12-08	82	223	170	102	229	174	1
929	24.2	No		1		2	1	2021-05-08	81	56	85	83	88	125	0
930	26.8	Yes		4		3	2	2021-12-08	78	101	97	98	121	113	0
931	15.7	No	27	1	3	1	1	2021-05-08	81	56	85	83	88	125	0
932	28.1	No		3		3	2	8-19-2021	67	75	91	86	88	107	0
933	24.7	No	19.8	2	2	2	2	8-19-2021	66	65	86	89	101	127	0
934	20.5	No	20	1	2	2	2	2021-09-09	68	56	57	87	98	83	0
935	16.7	No	21.7	1	2	1	1	2021-02-09	83	93	99	95	122	123	0
936	35.3	Yes	35.3	3	4	4	2	2021-02-09	76	136	107	91	170	126	0
937	23.2	No	31.2	2	4	2	2	2021-02-09	72	114.8	80	85	154	104	0
938	19.8	No	25.5	1	3	1	1	2021-02-09	73	87	71	85	127	111	0
939	29.2	No	32.5	3	4	3	2	2021-09-09	86	123.7	96	100	163	122	0
940	26	Yes	26.4	3	3	3	2	2021-09-09	76	115	106	91	151	147	0
941	18.4	No	18.9	1	2	1	1	2021-09-09	76	117.7	82	87	137	92	0
942	17.4	No	22.7	1	2	1	1	2021-09-09	75	90	116	97	125	127	0
943	22.3	No	24.8	3	2	2	2	2021-09-09	64	113	84	87	144	111	0
944	29.5	No	42.8	1	4	3	1	2021-09-09	78	129	110	96	157	129	0
945	19.9	No	20.4	1	2	1	1	2021-09-09	76	115	106	91	151	147	0
946	21	No	17.8	2	1	2	2	2021-02-09	74	71	69	87	122	104	0
947	18.9	No		1		1	1	2021-09-09	76	60.9	110	81	99	139	0
